## The effects of continuous *versus* partial reinforcement schedules on associative learning, memory and extinction in *Lymnaea stagnalis*

Susan Sangha\*, Chloe McComb\*, Andi Scheibenstock, Christine Johannes and Ken Lukowiak†  
*Department of Physiology and Biophysics, University of Calgary, Faculty of Medicine, 3330 Hospital Drive NW,  
Calgary, Alberta, Canada T2N 4N1*

\*Contributed equally to this study

†Author for correspondence (e-mail: lukowiak@acs.ucalgary.ca)

Accepted 1 February 2002

### Summary

**A continuous schedule of reinforcement (CR) in an operant conditioning procedure results in the acquisition of associative learning and the formation of long-term memory. A 50 % partial reinforcement (PR) schedule does not result in learning. The sequence of PR–CR training has different and significant effects on memory retention and resistance to extinction. A CR/PR schedule results in a**

**longer-lasting memory than a PR/CR schedule. Moreover, the memory produced by the CR/PR schedule is resistant to extinction training. In contrast, extinction occurs following the PR/CR schedule.**

Key words: operant conditioning, partial reinforcement, extinction, long-term memory, *Lymnaea stagnalis*.

### Introduction

Operant conditioning is a form of associative learning and results from the contingency established between a behavioural response and the presentation of a reinforcing stimulus (Mackintosh, 1974). The response–reinforcer contingency can be defined as the probability of receiving the reinforcement for performing the specific behaviour compared with the probability of receiving the reinforcing stimulus in the absence of the behavioural response. In operant conditioning, the frequency of emitting the behavioural responses can be increased or decreased as a result of applying positive or negative reinforcing stimuli, respectively (Domjan and Burkhard, 1993). For optimal conditioning, it is important that the reinforcing stimulus not be presented when the subject is not performing the particular behaviour. Operant conditioning, therefore, results in a specific association between a behavioural response and an external stimulus.

Different schedules of reinforcement are used in studies of operant conditioning and memory of the association. A schedule of continuous reinforcement (CR) involves 100 % contingency between the behaviour and the reinforcement; that is, reinforcement is presented every time the animal performs the behaviour. Partial reinforcement (PR), however, refers to any schedule in which there is less than 100 % contingency so that there are instances when the animal's behaviour is not reinforced. In some operant learning experiments, PR may interfere with the initial acquisition of the operant response, especially when a negative stimulus is used as the reinforcing stimulus; in others, PR has been found to lead eventually to superior performance (e.g. Weinstock, 1958).

If, following conditioning, animals receive extinction trials

(in which there is no reinforcement), the acquired association is lost, resulting in a behavioural phenotype that resembles the naïve state (Pavlov, 1927). The most important variable determining the magnitude of the behavioural effects of an extinction procedure is the schedule of reinforcement used in the acquisition phase of learning (Domjan and Burkhard, 1993). A PR-induced behaviour is more resistant to extinction than a CR-induced behaviour. This phenomenon has been termed the partial reinforcement extinction effect (PREE) and was first described in the work of both Skinner and Humphreys in the late 1930s (Skinner, 1938; Humphreys, 1939). How can partial, but not continuous, reinforcement offer resistance to extinction? One suggestion proposed by Amsel (1972) is that a 'disruptive process', based on non-reward, emerges in partial reinforcement acquisition. This disruptive process does not occur in ordinary CR training, so there is no 'counterconditioning'; extinction is therefore rapid after CR training. This has sometimes been referred to as the 'frustration theory'. Another possibility is that, if the subject does not receive reinforcement after each response during training, it may not immediately 'notice' when reinforcement ceases, as in extinction training. The change in reinforcement conditions is more dramatic and noticeable if reinforcement ceases after continuous reinforcement. This particular explanation of the PREE is called the discrimination hypothesis (Domjan and Burkhard, 1993) and is somewhat similar to the Pearce–Hall model in that a PR schedule maintains attention because trial outcomes are always 'surprising' (Bouton and Sunsay, 2001).

Operant conditioning protocols have been used in both vertebrates (Chen and Wolpaw, 1995; Feng-Chen and Wolpaw,

1996) and invertebrates (Horridge, 1962; Hoyle, 1980; Forman, 1984; Hawkins et al., 1985; Susswein et al., 1986; Cook and Carew, 1989a,b,c; Nargeot et al., 1997). We have studied operant conditioning of aerial respiratory behaviour in the freshwater mollusc *Lymnaea stagnalis* (Lukowiak et al., 1996). The advantage in using *Lymnaea stagnalis* as a model system for the study of the neuronal basis of associative learning and its memory is that it has a relatively simple behavioural repertoire and a relatively simple nervous system that is easily accessible to neurophysiological analysis (Spencer et al., 1999; Benjamin et al., 2001; Inoue et al., 2001). *Lymnaea stagnalis* is a pulmonate mollusc that makes periodic visits to the water surface to replenish its air supply. It is a bimodal breather that possesses a three-interneuron network whose necessity and sufficiency have been demonstrated to mediate aerial respiratory behaviour (Syed et al., 1990, 1992). Recently, we have demonstrated neural correlates of associative learning and its memory in one of the central pattern generator (CPG) neurons, RPeD1 (Spencer et al., 1999).

Aerial respiration in *Lymnaea stagnalis* occurs at the water interface and is achieved by opening and closing movements of its respiratory orifice, the pneumostome. Respiratory behaviour can be operantly conditioned by applying a mechanical stimulus to the open pneumostome whenever the animal attempts to breathe. This aversive reinforcement to the open pneumostome results in its immediate closure and a significant reduction in the overall aerial respiratory activity (Lukowiak et al., 1996).

Although operant conditioning has been studied before in invertebrates, little or no effort has been made to explore the effects of different contingency patterns on the ability to learn in these model systems. Three questions are addressed in the present paper. (i) Is PR sufficient to induce learning and a subsequent memory similar to that produced by a CR procedure? (ii) Once the acquisition of learning and its consolidation into memory using a CR procedure has occurred, can a PR procedure extend memory persistence? (iii) Finally, in snails subjected to a CR/PR training procedure, will the behaviour be more resistant to extinction (i.e. PREE), as has been demonstrated in various vertebrate preparations for over 60 years? The present findings serve as a basis for future experiments in which the neuronal mechanisms that occur under partial reinforcement in comparison with continuous reinforcement may be elucidated.

## Materials and methods

### *Lymnaea stagnalis*

*Lymnaea stagnalis* (L.), originally obtained from Vrije Universiteit in Amsterdam, were laboratory-bred in our snail facility at the University of Calgary. Snails were 20–25 mm in length. All animals used in these studies had continuous access to food (lettuce) in their home aquaria.

### Training and testing procedures

#### Apparatus and the general operant training procedure

A 11 beaker filled with 500 ml of eumoxic water was made

hypoxic by bubbling N<sub>2</sub> through it for 20 min. The individually marked snails were placed into the hypoxic water for a 10 min period of acclimation. During this period, they were free to open and close their pneumostome. At the end of this period, all snails were gently pushed under the water, and the training then began.

The reinforcing stimulus used in these experiments was a tactile stimulus to the pneumostome area applied as the pneumostome began to open. The tactile stimulus resulted in closure of the pneumostome; the snails usually remained at the water's surface. The tactile stimulus used throughout these experiments did not elicit the whole-body withdrawal/escape response. The time of each stimulus was recorded.

### Experiment 1

*Continuous reinforcement (CR)*. Snails were subjected to three 30 min training sessions with each training session separated by 1 h. A 30 min memory test session was administered the following day to test for long-term memory. Every pneumostome opening was immediately followed by a tactile stimulus to the pneumostome area, resulting in immediate closure of the pneumostome.

*Partial reinforcement (PR)*. Snails were subjected to three 30 min training sessions separated by 1 h. Snails receiving PR were given reinforcement on every second opening (50% of openings were reinforced) and fell into two categories: those receiving reinforcement every odd-numbered opening (i.e. reinforced on the first, third, fifth pneumostome opening, etc.) and those receiving reinforcement every even-numbered opening (i.e. reinforced on the second, fourth, sixth pneumostome opening, etc.). The time of each pneumostome opening was recorded.

### Experiment 2

*CR only*. Snails received two 45 min training sessions separated by 1 h. A 45 min memory test session was administered either 2 or 3 days later. Again, every pneumostome opening was immediately followed by a tactile stimulus to the pneumostome area, resulting in immediate closure of the pneumostome. The time of each stimulus was recorded.

*CR followed by PR*. Snails received two 45 min training sessions separated by 1 h on day 1 in which every pneumostome opening resulted in reinforcement (i.e. the CR schedule). On day 2, they received two further 45 min training sessions separated by 1 h. However, these snails now received reinforcement on every odd-numbered pneumostome opening (i.e. the PR schedule). Three days later (day 5), a 45 min memory test was given. During the memory test, all openings were reinforced (i.e. the CR schedule).

*PR followed by CR*. Snails first received two 45 min PR training sessions separated by 1 h on day 1. On day 2, they received a further two 45 min CR training sessions separated by 1 h. Three days later (day 5), a 45 min memory test was given. During the memory test, all openings were reinforced (i.e. the CR schedule).

### Experiment 3

*CR followed by PR and extinction training.* Snails initially received two 45 min CR training sessions separated by 1 h on day 1. On day 2, they received a further two 45 min PR training sessions separated by 1 h. On day 3, they received two 45 min extinction training sessions separated by 1 h. In the extinction training sessions, no reinforcement stimuli were administered. That is, animals were allowed to open their pneumostome without receiving any reinforcement. The following day (day 4), a 45 min memory test was given. During the memory test, all openings were reinforced (i.e. the CR schedule).

*PR followed by CR and extinction training.* Snails first received two 45 min PR training sessions separated by 1 h on day 1. On day 2, they received two 45 min CR training sessions separated by 1 h. On day 3, they received two 45 min extinction training sessions separated by 1 h. The following day (day 4), a 45 min memory test was given. During the memory test, all openings were reinforced (i.e. the CR schedule).

#### Operational definitions of learning, memory and extinction

We have operationally defined learning and memory as we have previously done (Lukowiak et al., 1996, 2000; Spencer et al., 1999). Briefly, associative learning is defined as a significant effect of training on the number of attempted pneumostome openings (one-way analysis of variance, ANOVA,  $P < 0.05$ ; followed by a *post-hoc* Fisher's LSD protected *t*-test,  $P < 0.05$  within each separate group). The number of attempted pneumostome openings in the final training session had to be significantly less than the number of attempted pneumostome openings in the first session.

Memory was defined as being present if: (i) the number of attempted pneumostome openings in the memory test session was not significantly different from the number of attempted openings in the last training session and (ii) the number of attempted openings in the memory test session was significantly less than the number of attempted openings in the first training session.

Extinction was defined as being present if the number of attempted pneumostome openings in the memory test session was significantly greater than the number of attempted openings in the last training session.

### Results

The first question we asked was whether it was necessary for the snail to receive the reinforcing stimulus every time it began to open its pneumostome to produce associative learning. Using a 50% partial reinforcement (PR) schedule in which we delivered the tactile stimulus to the first and then every other opening of the pneumostome (the 'odd' reinforcement schedule), snails ( $N=20$ ) received three 30 min PR training sessions with each training session separated by a 1 h interval. A second cohort of snails ( $N=20$ ) received a slightly different PR schedule of training. These snails (the 'even' group) received the tactile stimulus on the second and then every other attempted pneumostome opening. A control

group of snails ( $N=15$ ) received the reinforcing stimulus on every opening for three 30 min sessions with a 1 h rest interval between each session (the continuous reinforcement group, CR). The control CR group (Fig. 1A) demonstrated learning and long-term memory. However, neither the 'odd' nor the 'even' PR group demonstrated learning, and we did not, therefore, test for long-term memory (Fig. 1B,C). In both these groups, there was no significant difference in the number of attempted pneumostome openings across the three training sessions. Thus, a PR schedule does not result in learning in operant conditioning of aerial respiration in *Lymnaea stagnalis*.

Next, we wished to examine whether the PR schedule before or after the CR schedule differentially influenced learning and/or the duration of memory retention. To perform these experiments, we used a slightly different CR training procedure to produce learning and long-term memory. We used two naive groups of snails ( $N=20$  and  $N=19$ ) to show that two 45 min CR training sessions separated by a 1 h interval result in learning and long-term memory that persists for 2 days but not for 3 days (Fig. 2). We then turned our attention to the effect that a combined PR/CR schedule had on the ability of snails to learn and form memory using the two 45 min training session procedure. Thus, one group of snails (the CR/PR group, Fig. 3A) was given two 45 min CR training sessions with an interval of 1 h between each training session on day 1 and two 45 min PR training sessions of on day 2. A second group (the PR/CR group, Fig. 3B) of snails received the PR training sessions on day 1 and the CR training sessions on day 2. In the CR/PR group, the snails exhibited learning and long-term memory when tested 3 days after the final PR training session (i.e. on day 5). That is, the number of attempted pneumostome openings in the memory test session was not significantly different from the number in session 4 (the last training session) but was significantly different from that in session 1 ( $P < 0.01$ ) (Fig. 3A). In the PR/CR group, there was learning, but long-term memory was not demonstrated 3 days later. That is, the number of attempted pneumostome openings on the second CR training session (session 4) was statistically smaller than the number of attempted openings in the first CR training session (session 3). However, the number of attempted openings in the memory test session was significantly greater than the number in the last CR training session (session 4) but was not different from the number in the first CR training session (session 3) (Fig. 3B). Two main conclusions can be drawn from these data. The first is that the order in which snails receive CR and PR training alters their ability to form long-term memory. The second conclusion is that partial reinforcement occurring after the acquisition of learning prolongs the persistence of memory.

Previously, we have demonstrated that this associatively learned behaviour can be extinguished (McComb et al., 2001). We now wished to explore whether the different reinforcement schedules (CR *versus* PR) used above affected the process of extinction. We therefore subjected two different groups of snails to CR/PR or PR/CR reinforcement schedules prior to

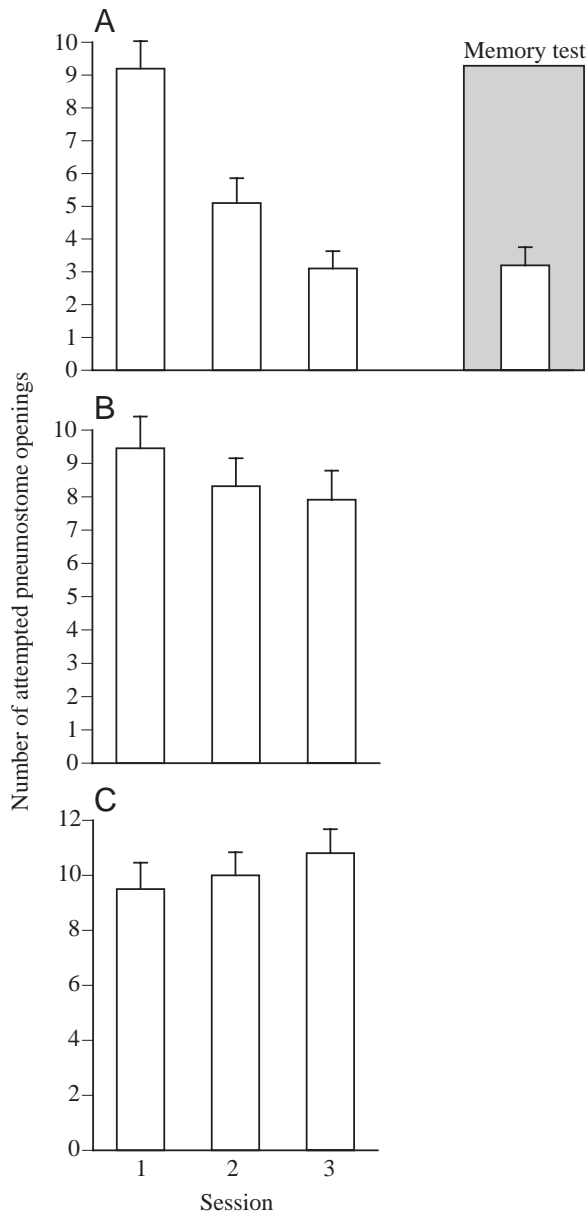

Fig. 1. A partial reinforcement (PR) schedule does not result in learning. Three separate groups of snails were used. (A) A control group of snails ( $N=15$ ) received three continuous reinforcement 30 min training sessions each separated by a 1 h interval. Learning occurred (ANOVA,  $F_{14,2}=32.07$ ,  $P<0.001$ ; session 3 significantly less than session 1,  $P<0.01$ ), and a long-term memory was formed [the memory test session, 24 h after session 3, was not significantly different from session 3 ( $P>0.05$ ) but was significantly different ( $P<0.01$ ) from session 1]. Two other cohorts, each of 20 snails, received three 30 min PR sessions each separated by a 1 h interval. One cohort was administered a tactile stimulus on odd-numbered (B) pokes, while the other was administered a tactile stimulus on even-numbered (C) pokes. In neither group was there learning (i.e. there was no significant difference between session 1 and sessions 2 and 3). Values are means + S.E.M.

administering extinction training (see Materials and methods). As in the experiments shown in Figs 2 and 3, each group of animals received two 45 min training sessions separated by a

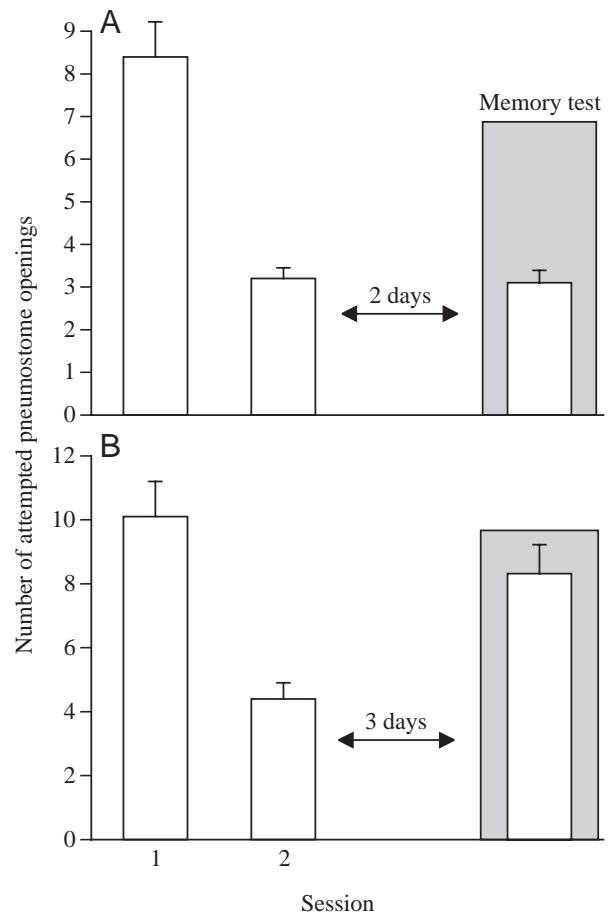

Fig. 2. A continuous reinforcement (CR) schedule results in learning and long-term memory that persists for 2 but not 3 days. (A) A group of 20 naïve snails received two 45 min CR training sessions with a 1 h interval between the sessions. Learning occurred (ANOVA,  $F_{19,1}=51.99$ ,  $P<0.001$ ; session 2 was significantly less than session 1,  $P<0.01$ ), and a long-term memory had been formed when tested 2 days later [the memory test session was not significantly different from session 2 ( $P>0.05$ ) but was significantly different ( $P<0.01$ ) from session 1]. (B) As in A, except that long-term memory was tested 3 days later and  $N=19$ . Learning occurred (ANOVA,  $F_{18,1}=47.32$ ,  $P<0.001$ ; session 2 significantly less than session 1,  $P<0.01$ ), but no long-term memory was formed [the memory test session was significantly different from session 2 ( $P<0.01$ ) and was not significantly different ( $P>0.05$ ) from session 1]. Values are means + S.E.M.

1 h interval of either CR or PR on day 1. On day 2, they again received two further 45 min training sessions separated by a 1 h interval (if they received CR on day 1, they received PR on day 2 and *vice-versa*). On day 3, both groups (CR/PR and PR/CR) received two 45 min extinction training sessions, with each training session separated by a 1 h rest interval. Twenty-four hours later, we tested for extinction in both groups. If extinction had occurred, we would expect there to be no memory. That is, the number of attempted pneumostome openings observed in the extinction test session should be significantly greater than the number on the last operant conditioning training session. The CR/PR group showed no



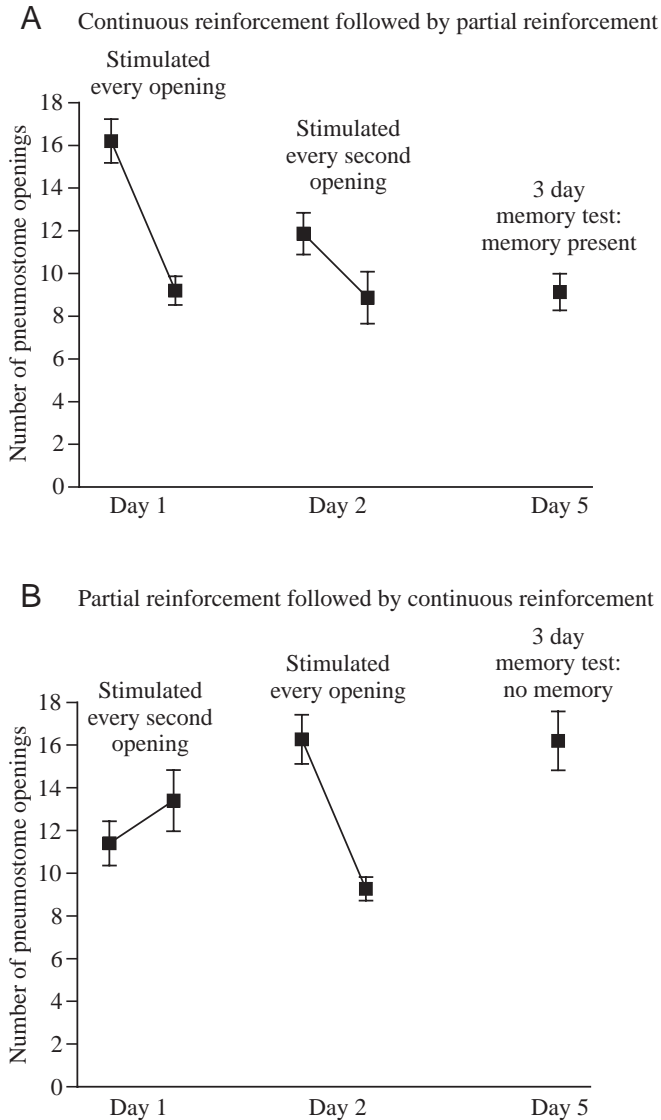

Fig. 3. The persistence of memory is affected by the sequence of continuous and partial reinforcement schedules. (A) Two continuous reinforcement (CR) 45 min training sessions on day 1 followed by two partial reinforcement (PR) training sessions on day 2 produces a long-term memory that persists for at least 3 days. The memory test session was significantly different from session 1 ( $P < 0.01$ ) but not significantly different from the last training session. (B) As in A except that snails first received the PR schedule and then the CR schedule. No memory was formed. The memory test session was not significantly different from session 1 but was significantly different from the last CR session on day 2 ( $P < 0.05$ ). Values are means  $\pm$  S.E.M. ( $N = 15$ ).

evidence of extinction (Fig. 4). That is, memory was still observed [i.e. the extinction test session was not significantly different from session 4 (the last training session) but was significantly different from the first CR training session (session 1)]. In contrast, memory was not found in the PR/CR group, showing that extinction had occurred. That is, following the extinction training sessions, the number of attempted pneumostome openings in the extinction test session was

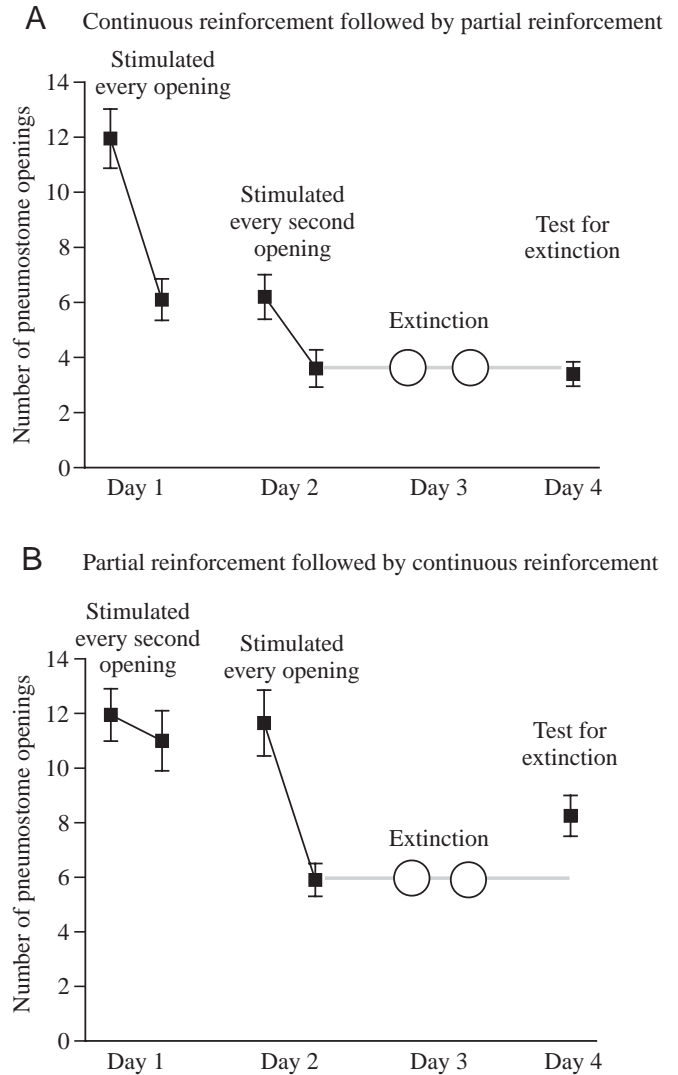

Fig. 4. Snails receiving a CR/PR training schedule are more resistant to extinction than snails receiving a PR/CR schedule. (A). Two continuous reinforcement (CR) 45 min training sessions on day 1 followed by two partial reinforcement (PR) training sessions on day 2 produce a long-term memory that is resistant to extinction. On the day following the PR schedule of training (day 3), the snails received two extinction training sessions. When given the test for extinction on the following day (day 4), extinction was not observed (i.e. long-term memory was present). That is, the number of pneumostome openings in the extinction test session was not significantly different from that in the last PR session ( $P > 0.05$ ). (B) As in A except that this naïve group of snails received the PR schedule first (day 1) followed by the CR schedule (day 2). Extinction training on day 3 was sufficient to produce extinction. That is, the number of pneumostome openings in the extinction test session on day 4 was significantly different from that in the the last CR (day 2) training session ( $P < 0.01$ ). Values are means  $\pm$  S.E.M. ( $N = 20$ ).

significantly different from that in the last operant training session (session 4).

Previously, we have demonstrated that yoked control snails do not exhibit learning or long-term memory. Although we performed yoked control experiments on all CR procedures

used here, the results have not been presented because they are similar to those published previously (see Lukowiak et al., 2000; Haney and Lukowiak, 2001).

### Discussion

In this study, we examined the effect of partial reinforcement (PR) on the acquisition of learning, its consolidation into memory and the resistance of memory to extinction in *Lymnaea stagnalis*. Although these phenomena have been examined previously in various mammalian species (Mackintosh, 1974), this is the first time to our knowledge that they have been successfully investigated in a molluscan model system. Here, we have shown that a 50% PR schedule is not sufficient for acquisition of associative learning. Typically, *Lymnaea stagnalis* can be quickly operantly conditioned with as little as one brief 15 min session of continuous reinforcement (CR) (Lukowiak et al., 2000; Smyth and Lukowiak, 2001). However, neither the 'odd' nor the 'even' PR schedule was sufficient for the acquisition of associative learning (Fig. 1B,C). In contrast, the three 30 min sessions of CR were sufficient for the acquisition of associative learning and long-term memory. Gonzalez et al. (2000) recently reported similar results from a study involving rats trained on the Morris place task. They showed that animals trained to escape from water failed to learn the location of a submerged platform when it was presented on only 50% of trials. However, animals exhibited improvement on the acquisition task when the platform was present on 75% and 100% of trials. We have not yet attempted to determine whether a 75% PR schedule would be sufficient for the acquisition of associative learning in *Lymnaea stagnalis*. Taken together, these results suggest that, while rapid learning occurs over a CR schedule, the use of PR prior to CR has detrimental consequences on learning and subsequent memory formation.

A number of hypotheses have been developed to explain why learning does not occur with a PR schedule. However, none of them adequately explains why learning was not observed. For instance, Williams' invariance hypothesis (Williams, 1989) suggests that the reduced rate of acquisition with PR training may be due to a decrease in the number of reinforcement stimuli delivered. That is, using a PR schedule, the snails receive fewer tactile stimuli in each training session than occurs with the CR schedule. Fewer reinforcement trials would, in this scenario, lead to poorer or no learning. As appealing and intuitive as this hypothesis is, our data are not totally consistent with it. Both associative learning and long-term memory occur with 15 min training sessions (Lukowiak et al., 2000; Smyth and Lukowiak, 2001). In those two studies, snails received approximately the same number of tactile stimuli as the snails did in the present study with the PR schedule. It may be that with a longer PR training session, such as a 1 h session, learning could be observed. A single 1 h CR session is sufficient to produce learning and long-term memory that persists for at least 1 day (Lukowiak et al., 2000). Such experiments are planned in the future.

In addition to the snails' inability to form a learned association with the 50% PR schedule, we showed that this PR training procedure has a number of significant effects on subsequent memory formation. The first of these effects was the detrimental (i.e. decreased length of memory persistence) effect on the ability to form memory following subsequent CR training sessions (Fig. 3B). That is, even though there was no significant change in the number of tactile stimuli delivered over the two PR training sessions, these 'PR-challenged' snails could not form memories as long-lasting as could naïve snails with subsequent CR training (Fig. 3). This result could be interpreted as a form of 'blocking', which has previously been seen in both vertebrate and molluscan preparations (Sahley et al., 1981). It is not understood why this blocking effect occurs at a mechanistic level. However, the effect is not due to the fact that there were two PR sessions together with two CR sessions. When the two CR sessions occurred first, long-term memory was still observed (in fact, it existed for longer; see below) following the PR sessions (compare Fig. 2B with Fig. 3A). Thus, the order of CR *versus* PR sessions is of obvious importance. One advantage of our model system over most other systems is that we may be able to determine at the level of a single neuron, RPeD1, known to be necessary for aerial respiratory behaviour, what the cellular changes are that accompany PR/CR or CR/PR training.

The second effect on memory formation of PR training was an increase in the persistence of long-term memory when PR training occurred after learning had occurred with CR training. Two 45 min CR training sessions result in a memory that persists for 2 but not for 3 days (Fig. 2). However, we found that if, following the two CR training sessions, snails received two 45 min PR sessions, long-term memory persisted for at least 3 days (Fig. 3A). That is, long-term memory was extended by at least 1 day. Again, this demonstrates that the presentation order of PR and CR has significantly different effects. The order of CR/PR presentation can thus either increase or decrease memory persistence. These data parallel the differences in memory persistence that occur when 'massed' *versus* 'spaced' training are compared. While the same level of performance is achieved (i.e. learning) with massed *versus* spaced training, spaced training normally produces a much longer-lasting memory (Lukowiak et al., 1998). CR reinforcement at the beginning of the acquisition phase of learning appears to be necessary but, once some threshold has been reached, a PR schedule can be implemented to maintain the acquired response (Hothersall, 1966).

A third effect of PR on memory retention was the finding that, following the CR/PR training sequence, memory was resistant to extinction (Fig. 4). Previously, we have demonstrated that the associatively learned decrease in aerial respiration can be extinguished (McComb et al., 2001). Using similar extinction protocols we found that, following the CR/PR training sequence, extinction was not observed. That is, memory was still present. This has been termed the partial reinforcement extinction effect (PREE) (Skinner, 1938; Humphreys, 1939). Experimenters have noted this

phenomenon in learning studies involving vertebrates ranging from toads (Muzio et al., 1994) to humans (Svartdal, 2000; Leonard, 1975). To our knowledge, this is the first time that PREE has been demonstrated for operant conditioning in a mollusc.

We still do not understand why the PR schedule of reinforcement following learning acquisition results in a more persistent memory. Amsel's 'frustration theory' (Mackintosh, 1974) proposes that non-reinforced conditioning, as occurs with PR, leads to an internal state called frustration. Frustration ultimately leads to increased attention, thus allowing for stronger associations between the behaviour and the reinforcing stimuli. This would explain why a PR schedule after acquisition with a CR schedule might lead to a longer-lasting memory or one more resistant to extinction. However, in the context of our experiments, it is uncertain how the absence of a 'poke to the pneumostome' would lead to 'frustration' in the snails. A second hypothesis is termed the Pearce–Hall model (Bouton and Sunsay, 2001). In this scenario, the intermixture of reinforced and unreinforced trials increases the 'attention' of the subject. Attention is increased because the trial outcomes are always 'surprising'. As stated above, increased attention should increase association strength and thus allow memory to be more persistent. Whether any of these hypotheses is adequate to explain the underlying neuronal mechanisms of learning and retention of memory will be studied in our model system.

Although the PREE has been well documented at the behavioural level, few studies have been performed to determine its underlying neuronal mechanisms. Evidence from lesion studies in vertebrates points to the hippocampus as the site responsible. Thus, the PREE is prevented if lesions are made in mammals before training to the hippocampus (Gonzalez et al., 2000; Jarrard et al., 1986) or to the dorsal ascending noradrenergic bundle, which projects to the hippocampus (Owen et al., 1982). Moreover, lesions to the medial pallium, the amphibian homologue of the hippocampus, also prevent the PREE (Muzio et al., 1994). The discovery of the PREE in *Lymnaea stagnalis* offers the opportunity to explore this effect at the level of single neurons known to be both necessary and sufficient for aerial respiratory behaviour (Syed et al., 1990, 1992; Spencer et al., 1999).

This study was supported by the CIHR.

## References

- Amsel, A. (1972). Inhibition and mediation in classical, Pavlovian and instrumental conditioning. In *Inhibition and Learning* (ed. R. A. Boakes and M. Halliday). London: Academic.
- Benjamin, P., Staras, K. and Kemenes, G. (2000). A systems approach to the cellular analysis of associative learning in the pond snail *Lymnaea*. *Learning Memory* **7**, 124–131.
- Bouton, M. and Sunsay, C. (2001). Contextual control of appetitive conditioning: Influence of a contextual stimulus generated by a partial reinforcement procedure. *Q. J. Exp. Psychol.* **54B**, 109–125.
- Chen, K. Y. and Wolpaw, J. R. (1995). Operant conditioning of H-reflex in freely moving rats. *J. Neurophysiol.* **73**, 411–415.
- Cook, D. G. and Carew, T. J. (1989a). Operant conditioning of head-waving in *Aplysia*. I. Identified muscles involved in the operant response. *J. Neurosci.* **9**, 3097–3106.
- Cook, D. G. and Carew, T. J. (1989b). Operant conditioning of head-waving in *Aplysia*. II. Contingent modification of electromyographic activity in identified muscles. *J. Neurosci.* **9**, 3107–3114.
- Cook, D. G. and Carew, T. J. (1989c). Operant conditioning of head-waving in *Aplysia*. III. Cellular analysis of possible reinforcement pathways. *J. Neurosci.* **9**, 3115–3122.
- Domjan, M. and Burkhard, B. (1993). *Domjan and Burkhard's The Principles of Learning and Behaviour*. Third edition. Pacific Grove: Brooks/Cole Publishing Co.
- Feng-Chen, K. C. and Wolpaw, J. R. (1996). Operant conditioning of H-reflex changes synaptic terminals on primate motoneurons. *Proc. Natl. Acad. Sci. USA* **93**, 9206–9211.
- Forman, R. R. (1984). Leg position learning by an insect. I. A heat avoidance learning paradigm. *J. Neurobiol.* **1**, 127–140.
- Gonzalez, C. L. R., Kolb, B. and Whishaw, I. Q. (2000). A cautionary note regarding drug and brain lesion studies that use swimming pool tasks: partial reinforcement impairs acquisition of place learning in a swimming pool but not on dry land. *Behav. Brain Res.* **112**, 43–52.
- Haney, J. and Lukowiak, K. (2001). Context learning and effect of context on memory retrieval in *Lymnaea*. *Learning Memory* **8**, 35–43.
- Hawkins, R. D., Clark, G. and Kandel, E. (1985). Operant conditioning and differential classical conditioning of gill withdrawal in *Aplysia*. *Soc. Neurosci. Abstr.* **11**, 796.
- Horridge, G. A. (1962). Learning of leg position by headless insects. *Nature* **193**, 697–698.
- Hothersall, D. (1966). Resistance to extinction when continuous reinforcement is followed by partial reinforcement. *J. Exp. Psychol.* **72**, 109–112.
- Hoyle, G. (1980). Learning, using natural reinforcements, in insect preparations that permit cellular neuronal analysis. *J. Neurobiol.* **11**, 323–354.
- Humphreys, L. G. (1939). The effect of random alternation of reinforcement on the acquisition and extinction of conditioned eyelid reactions. *J. Exp. Psychol.* **25**, 141–158.
- Inoue, T., Haque, Z., Lukowiak, K. and Syed, N. (2001). Hypoxia-induced respiratory patterned activity in *Lymnaea* originates at the periphery. *J. Neurophysiol.* **86**, 156–163.
- Jarrard, L. E., Feldon, J., Rawlins, J. N. P., Sinden, J. D. and Gray, J. A. (1986). The effects of intrahippocampal ibotenate lesions on the resistance to extinction after continuous or partial reinforcement. *Exp. Brain Res.* **61**, 519–530.
- Leonard, D. (1975). Partial reinforcement effects in classical aversive conditioning in rats and human beings. *J. Comp. Physiol. Psychol.* **88**, 596–608.
- Lukowiak, K., Adatia, N., Krieger, D. and Syed, N. (2000). Operant conditioning in *Lymnaea*: Evidence for intermediate and long-term memory. *Learning Memory* **7**, 140–150.
- Lukowiak, K., Cotter, R., Westley, J., Ringseis, E., Spencer, G. and Syed, N. (1998). Long term memory of an operantly conditioned respiratory behaviour in *Lymnaea stagnalis*. *J. Exp. Biol.* **199**, 683–691.
- Lukowiak, K., Ringseis, E., Spencer, G., Wildering, W. and Syed, N. (1996). Operant conditioning of aerial respiratory behaviour in *Lymnaea stagnalis*. *J. Exp. Biol.* **199**, 683–691.
- Mackintosh, N. (1974). *The Psychology of Animal Learning*. New York: Academic Press.
- McComb, C., Sangha, S., Qadry, S., Yue, J., Scheibenstock, A. and Lukowiak, K. (2001). Context extinction and associative learning in *Lymnaea*. *Neurobiol. Learning Memory* (in press).
- Muzio, R., Segura, E. and Mauricio, P. (1994). Learning under partial reinforcement in the toad (*Bufo arenarum*): effect of lesions in the medial pallium. *Behav. Neural Biol.* **61**, 36–46.
- Nargeot, R., Baxter, D. A. and Byrne, J. H. (1997). Contingent-dependent enhancement of rhythmic motor patterns: an *in vitro* analog of operant conditioning. *J. Neurosci.* **17**, 8093–8105.
- Owen, S., Boarder, M. R., Gray, J. A. and Fillenz, M. (1982). Acquisition and extinction of continuously and partially reinforced running in rats with lesions of the dorsal noradrenergic bundle. *Behav. Brain Res.* **5**, 11–41.
- Pavlov, I. (1927). *Conditioned Reflexes* (translated by G. V. Anrep). London, Oxford University Press.
- Sahley, C., Rudy, J. and Gelperin, A. (1981). An analysis of associative learning in a terrestrial mollusk. I. Higher-order conditioning, blocking and a US-pre-exposure effect. *J. Comp. Physiol.* **144**, 1–8.

- Skinner, B. F.** (1938). *The Behavior of Organisms*. New York: Appleton-Century-Crofts.
- Smyth, K., Sangha, S. and Lukowiak, K.** (2002). Gone but not forgotten: The lingering effects of intermediate term memory on the persistence of LTM. *J. Exp. Biol.* **205**, 131–140.
- Spencer, G., Syed, N. and Lukowiak, K.** (1999). Neural changes after operant conditioning of the aerial respiratory behaviour in *Lymnaea stagnalis*. *J. Neurosci.* **19**, 1836–1843.
- Susswein, A. J., Schwartz, M. and Feldman, E.** (1986). Learned changes of feeding behaviour in *Aplysia* in response to edible and inedible foods. *J. Neurosci.* **6**, 1513–1527.
- Svartdal, F.** (2000). Persistence during extinction: Are judgments of persistence affected by contingency information? *Scand. J. Psychol.* **41**, 315–328.
- Syed, N. I., Bulloch, A. G. M. and Lukowiak, K.** (1990). *In vitro* reconstruction of the respiratory central pattern generator of the mollusk *Lymnaea*. *Science* **250**, 282–285.
- Syed, N. I., Ridgeway, R., Lukowiak, K. and Bulloch, A. G. M.** (1992). Transplantation and integration of an identified respiratory interneuron in *Lymnaea stagnalis*. *Neuron* **8**, 767–774.
- Weinstock, S.** (1958). Acquisition and extinction of a partially reinforced running response at a 24-hour intertrial interval. *J. Exp. Psychol.* **46**, 151–158.
- Williams, B. A.** (1989). Partial reinforcement effects on discrimination learning. *Anim. Learning Behav.* **17**, 418–432.
